# Supplementary material for: A Graphical Modelling Approach to the Dissection of Highly Correlated Transcription Factor Binding Site Profiles
Source: PLOS journal article supplement (doi:10.1371/journal.pcbi.1002725), 2012-11-08
Supplement: S1 (10.1371/journal.pcbi.1002725.s001) [file journal.pcbi.1002725.s001]

301 Moved Permanently

# Moved Permanently

The document has moved here.

---

Apache Server at www.ploscompbiol.org Port 80
